# Supplementary material for: Enhancing upconversion via constructing local energy clusters in lanthanide-doped fluoride nanoparticles
Source: Royal Society of Chemistry journal article supplement (doi:10.1039/d3tc02494f), 2023-01-01
Supplement: d3tc02494f1.pdf [file d3tc02494f1.pdf]

## Electronic Supplementary Material

### Enhancing upconversion via constructing local energy cluster in lanthanide doped fluoride nanoparticles

Haolin Yang<sup>1</sup>, Anshuo Zhang<sup>1</sup>, Hai Guo<sup>2\*</sup>, Denghao Li<sup>1</sup>, Shiqing Xu<sup>1</sup>, and Lei Lei<sup>1\*</sup>

<sup>1</sup>Key Laboratory of Rare Earth Optoelectronic Materials and Devices of Zhejiang Province, Institute of Optoelectronic Materials and Devices, China Jiliang University, Hangzhou 310018, P. R. China

<sup>2</sup> Department of Physics, Zhejiang Normal University, Jinhua, Zhejiang 321004, P. R. China

\*Corresponding authors: leilei@cjlu.edu.cn (L, Lei), ghg@zjnu.cn (H, Guo).

#### Supplementary Figures

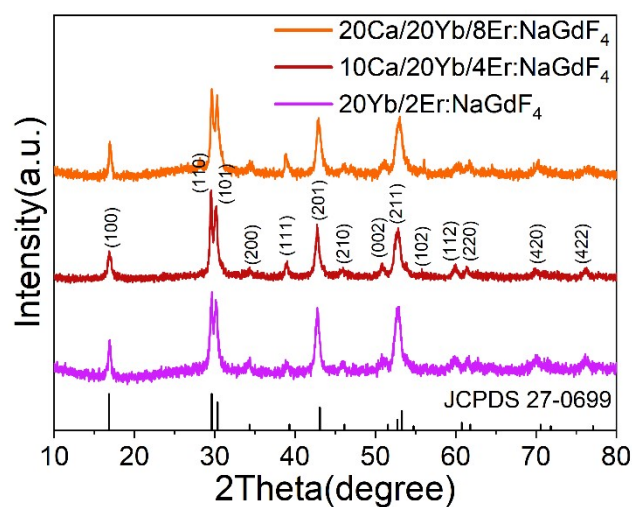

**Figure S1.** XRD patterns of the as-prepared 20Yb/2Er: NaGdF<sub>4</sub>, 20Yb/4Er/10Ca: NaGdF<sub>4</sub> and 20Yb/8Er/20Ca: NaGdF<sub>4</sub> NPs.

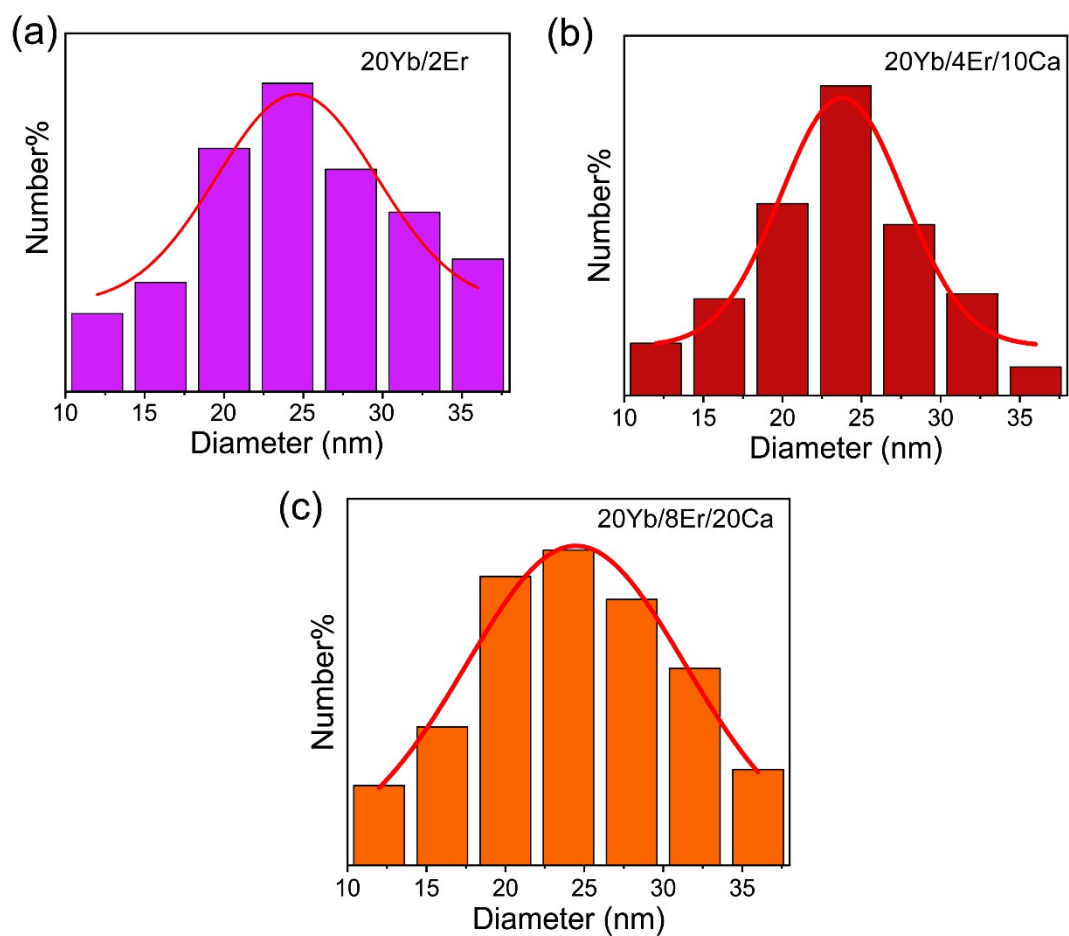

**Figure S2.** Histograms of particle size distributions for the 20Yb/2Er: NaGdF<sub>4</sub> (a), 20Yb/4Er/20Ca: NaGdF<sub>4</sub> (b), 20Yb/8Er/20Ca: NaGdF<sub>4</sub> NPs (c).

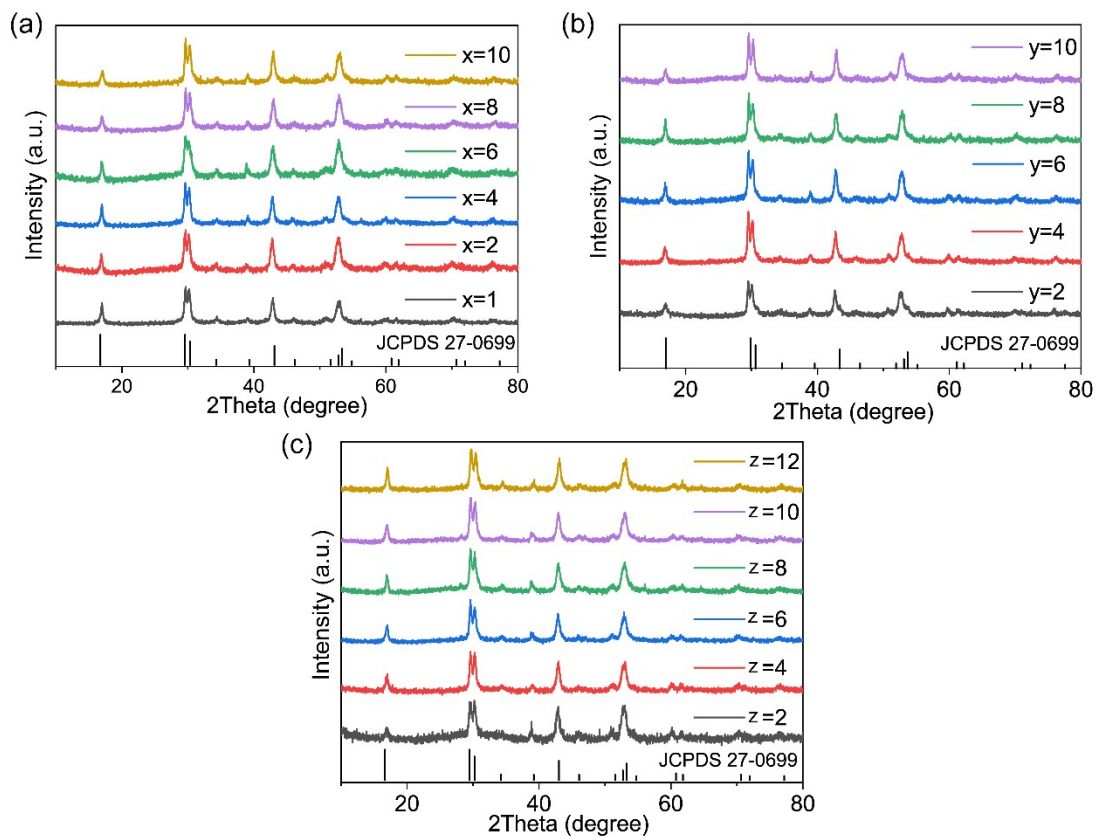

**Figure S3.** XRD patterns of the as-prepared 20Yb/xEr: NaGdF<sub>4</sub> (x = 1, 2, 4, 6, 8, 10) (a), 20Yb/yEr/20Ca: NaGdF<sub>4</sub> (y = 2, 4, 6, 8, 10) (b), 20Yb/8Er/zCa: NaGdF<sub>4</sub> (z = 2, 4, 6, 8, 10, 12) NPs (c).

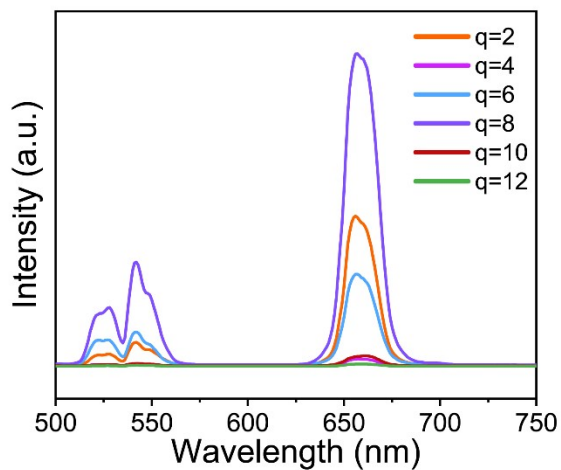

**Figure S4.** UC emission spectra of the 20Yb/qEr/10Ca: NaGdF<sub>4</sub> NPs (q = 2, 4, 6, 8, 10, 12) prepared at the reaction temperature of 200 °C and heating time of 10 hours.

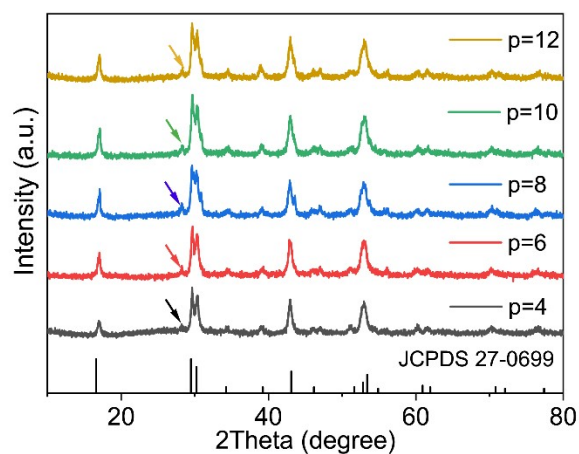

**Figure S5.** XRD patterns of the as-prepared 20Yb/pEr/30Ca: NaGdF<sub>4</sub> (p = 2, 4, 6, 8, 10, 12).

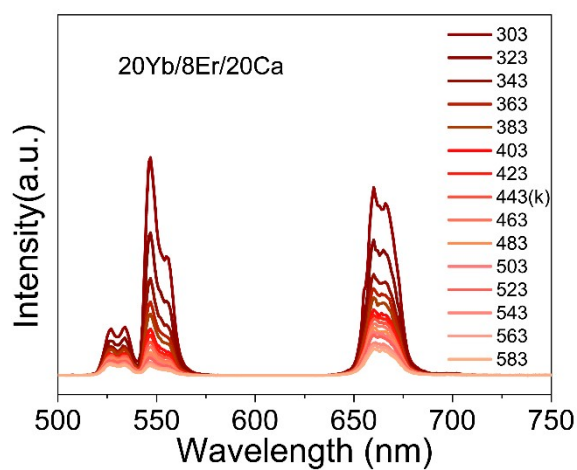

**Figure S6.** Temperature dependent UC spectra of the 20Yb/8Er/20Ca: NaGdF<sub>4</sub> NPs

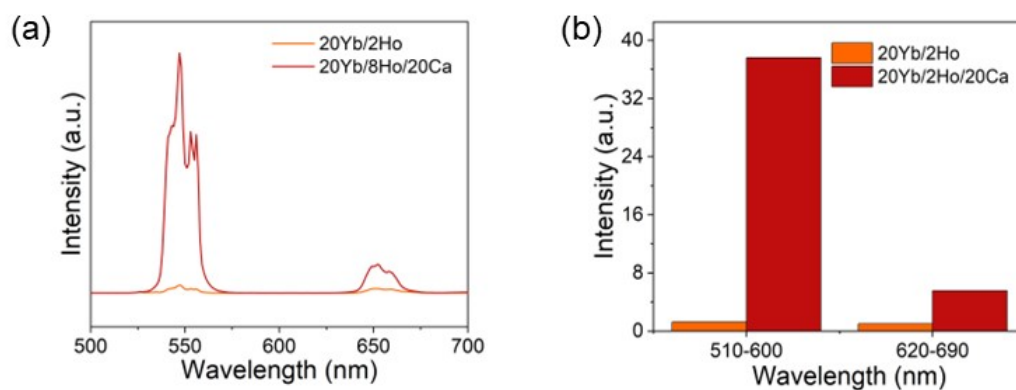

**Figure S7.** (a) UC emission spectra and (b) integral intensity variations of the 20Yb/2Ho: NaGdF<sub>4</sub> and 20Yb/8Ho/20Ca: NaGdF<sub>4</sub> NPs.

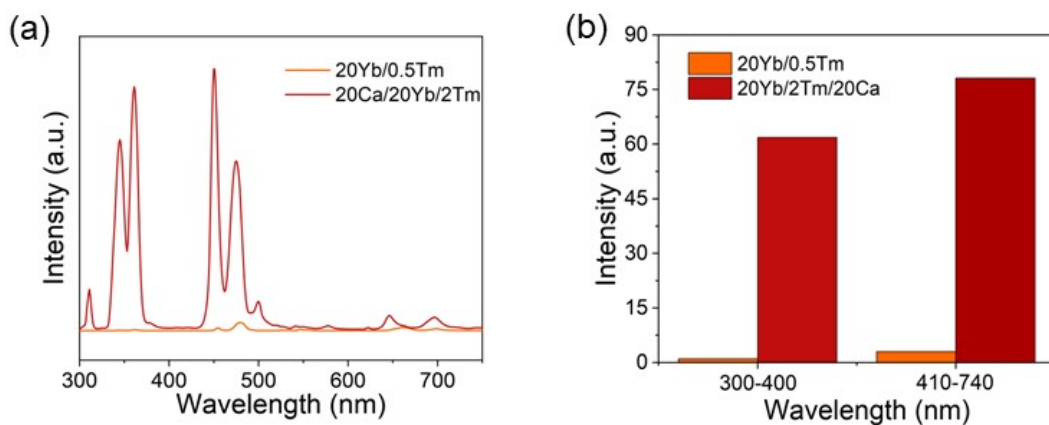

**Figure S8.** (a) UC emission spectra and (b) integral intensity variations of the 20Yb/0.5Tm: NaGdF<sub>4</sub> and 20Yb/2Tm/20Ca: NaGdF<sub>4</sub> NPs.

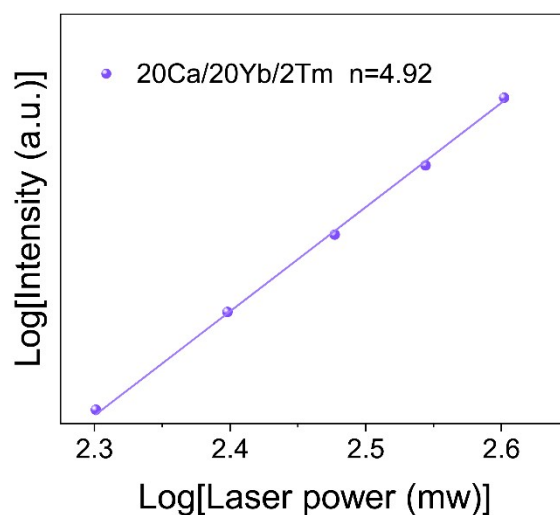

**Figure S9.** Log-log plots of UC emission intensity versus pumping power for the 20Yb/2Tm/20Ca: NaGdF<sub>4</sub> NPs.

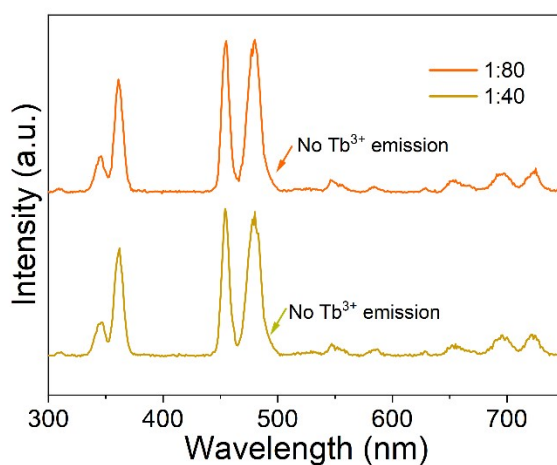

**Figure S10.** UC spectra of the mixed 20Yb/2Tm/20Ca: NaYF<sub>4</sub> NPs and the 15Tb: NaGdF<sub>4</sub> NPs with different ratios.
